# Supplementary material
Source: PubMed Central journal article supplement (PMC4702671)
Supplement: JVI.02369-15_zjv999091189so1.pdf [file JVI.02369-15_zjv999091189so1.pdf]

Supplemental Movie. Predicted complex model of A3F CTD and Vif. Ribbon representation of the A3F CTD is colored in wheat. The position of catalytic zinc ion in A3F CTD is shown as a black sphere. Surface representation of the extended Vif and CBF- $\beta$  are colored in white and light blue, respectively. Four residues (L291, A292, R293, and E324) unique for A3F-Vif interaction are represented as sticks and colored in magenta.
